# Supplementary material for: The repression of Notch signaling occurs via the destabilization of mastermind-like 1 by Mesp2 and is essential for somitogenesis
Source: Oxford University Press journal article supplement (doi:10.1242/dev.055533), 2010-11-24
Supplement: dev055533tables1.pdf [file dev055533tables1.pdf]

**Table S1. Primers used to genotype the knock-in/transgenic mice and for the semi-quantitative RT-PCR analysis**

| Primer       | Sequence (5'-3')          |
|--------------|---------------------------|
| NeoAR2       | AAGCCATAGAGCCCACCGCATCCCC |
| RBP-J-3'     | CACATCGTCCACAGCAACCGTGGTG |
| HLH-R3       | GGAAGTTGAGTTCCTCATCACGATC |
| NeoAL2       | GGGGATGCGGTGGGCTCTATGGCTT |
| GFP-L1       | CCTGGTCGAGCTGGACGGCGAC    |
| GFP-R1       | TCACGAACTCCAGCAGGACCATG   |
| HA-mam1 Fw01 | TGGGCCCTGGAATGGTGCTG      |
| HA-mam1 Rv01 | TCGGCTCCAGAAGGCTTGTC      |
| G3PDH Fw     | ACCACAGTCCATGCCATCAC      |
| G3PDH Rv     | TCCACCACCCTGTTGCTGTA      |
